# Supplementary material for: Impact of maternal engrafted cytomegalovirus‐specific CD8+ T cells in a patient with severe combined immunodeficiency
Source: PubMed Central journal article supplement — Clin Transl Immunology. 2021 Apr 13;10(4):e1272. doi: 10.1002/cti2.1272 (PMC8043123; doi:10.1002/cti2.1272), 2021-04-13
Supplement: CTI2-10-e1272-s001.pdf [file CTI2-10-e1272-s001.pdf]

1 **Supplementary table 1.** TREC results for the neonatal SCID screening. Triplicate dried blood spots were  
2 used for TREC and  $\beta$ -actin detection.

|                 | TREC (copies $\mu\text{L}^{-1}$ ) | $\beta$ -actin (copies $\mu\text{L}^{-1}$ ) | Result        |
|-----------------|-----------------------------------|---------------------------------------------|---------------|
| Controls*       |                                   |                                             |               |
| No TREC control | 0                                 | 600                                         | NA            |
| Low control     | 120                               | 20                                          | NA            |
| High control    | 670                               | 600                                         | NA            |
| SCID patient    |                                   |                                             |               |
| Test 1          | 0                                 | 123                                         | TREC negative |
| Test 2          | 0                                 | 184                                         | TREC negative |
| Test 4          | 12                                | 127                                         | TREC negative |

3 TREC  $<40$  copies  $\mu\text{L}^{-1}$  was defined as TREC negative<sup>23</sup>.

4 NA indicates not available.

5 \*The values for controls were provided from the manufacturer (Perkin Elmer).

**Supplementary table 2.** Laboratory findings after hematopoietic cell transplantation

| Age               |                                         | 238D             | 269D   | 308D              | 338D            | 353D         | 16M                   |
|-------------------|-----------------------------------------|------------------|--------|-------------------|-----------------|--------------|-----------------------|
| Lab               | Day after HCT                           | Day 40           | Day 71 | Day 110           | Day 140         | D153         | D364                  |
|                   | Normal                                  |                  |        |                   |                 |              |                       |
| WBC               | 6000-14,000, $\mu\text{L}^{-1}$         | 5310             | 6400   | 4950              | 2490            | 4940         | 5580                  |
| ALC               | 1500-3000, $\mu\text{L}^{-1}$           | 3650             | 4520   | 4010              | 1230            | 2260         | 3260                  |
| Hb                | 10.5-14.0, g $\text{dL}^{-1}$           | 9.6              | 11.2   | 13.7              | 7.0             | 9.6          | 12.6                  |
| PLT               | 150-400, $\times 10^3 \mu\text{L}^{-1}$ | 288              | 396    | 405               | 61              | 364          | 274                   |
| CRP               | 0-8, mg $\text{dL}^{-1}$                | <0.3             | <0.3   | <0.3              | <0.3            | 0.5          | -                     |
| TB                | 0.2-0.8, mg $\text{dL}^{-1}$            | 0.1              | 0.1    | 0.2               | 1.5             | 0.4          | 0.3                   |
| AST               | 13-34, IU $\text{L}^{-1}$               | 118              | 65     | 114               | 501             | 57           | 35                    |
| ALT               | 5-46, IU $\text{L}^{-1}$                | 114              | 56     | 103               | 475             | 37           | 35                    |
| CD3 <sup>+</sup>  | 2284-4776, $\mu\text{L}^{-1}$           | 3500             | 4571   | 4014              | 1784            | -            | 1417                  |
| CD4 <sup>+</sup>  | 1523-3472, $\mu\text{L}^{-1}$           | 7                | 32     | 269               | 585             | -            | 585                   |
| CD8 <sup>+</sup>  | 524-1583, $\mu\text{L}^{-1}$            | 1536             | 2115   | 2414              | 832             | -            | 832                   |
| CD19 <sup>+</sup> | 776-2238, $\mu\text{L}^{-1}$            | 1886             | 2267   | -                 | 242             | -            | 228                   |
| CD56 <sup>+</sup> | 230-801, $\mu\text{L}^{-1}$             | 28               | 64     | 76                | 21              | -            | 22                    |
| IgG               | 176-601, mg $\text{dL}^{-1}$            | 843 (on<br>IGRT) |        | 1137 (on<br>IGRT) |                 |              | 254 (without<br>IGRT) |
| IgA               | 4.4-84, mg $\text{dL}^{-1}$             | Not<br>detected  |        | Not<br>detected   |                 |              | Not detected          |
| IgM               | 17-105, mg $\text{dL}^{-1}$             | 8.5              |        | 17.5              |                 |              | 42.7                  |
| CMV               | <500, copies $\text{mL}^{-1}$           | 3055             | 1375   | Not<br>detected   | Not<br>detected | Not detected | Not detected          |

WBC indicates white blood cell; ALC, absolute lymphocyte count; Hb, hemoglobin; PLT, platelet count; CRP, C-reactive protein; TB, total bilirubin; AST, aspartate aminotransferase; ALT, alanine aminotransferase; LDH, lactate dehydrogenase; Ig, immunoglobulin; D, day; M, month; IGRT; immunoglobulin G replacement therapy..

**Supplementary table 3.** Main clinical features associated with the patient

| Clinical features            |                                               | Age at onset                                                                                                            |
|------------------------------|-----------------------------------------------|-------------------------------------------------------------------------------------------------------------------------|
| Fever of unknown origin      | No                                            | -                                                                                                                       |
| Skin rash                    | No                                            | -                                                                                                                       |
| Lymphadenopathy (mesenteric) | <b>Yes</b>                                    | <b>4.5 months</b>                                                                                                       |
| Hepatomegaly                 | No                                            | -                                                                                                                       |
| Splenomegaly                 | <b>Yes</b>                                    | <b>4.5 months</b>                                                                                                       |
| Neuropathy                   | No                                            | -                                                                                                                       |
| Bronchiectasis               | No                                            | -                                                                                                                       |
| Enteropathy                  | No                                            | -                                                                                                                       |
| Autoimmune cytopenia         | No                                            | -                                                                                                                       |
| Vasculitis                   | No                                            | -                                                                                                                       |
| Malignancy                   | No                                            | -                                                                                                                       |
| Developmental delay          | No                                            | -                                                                                                                       |
| Failure to thrive            | No                                            | -                                                                                                                       |
| Diarrhea                     | <b>Yes</b>                                    | <b>6 months</b>                                                                                                         |
| Sentinel infections          |                                               |                                                                                                                         |
| CMV                          | <b>CMV hepatitis</b>                          | <b>3 months (1<sup>st</sup>), 5.5 months (2<sup>nd</sup>),<br/>7 months (3<sup>rd</sup>), 8 months (4<sup>th</sup>)</b> |
| VZV                          | No                                            | -                                                                                                                       |
| HSV                          | No                                            | -                                                                                                                       |
| PJP                          | No                                            | -                                                                                                                       |
| Rotavirus                    | No                                            | -                                                                                                                       |
| BCG infection                | <b>Probable</b>                               | <b>4.5 months</b>                                                                                                       |
| Fungus                       | No                                            | -                                                                                                                       |
| Other infections 1           | <b><i>E. coli</i> urinary tract infection</b> | <b>1.5 months</b>                                                                                                       |
| Other infections 2           | <b>Noroviral enteritis</b>                    | <b>6 months</b>                                                                                                         |
| Other infections 3           | <b>Lt, 1<sup>st</sup> toe cellulitis</b>      | <b>5 months</b>                                                                                                         |

CMV indicates cytomegalovirus; VZV, varicella zoster virus; HSV, herpes simplex virus; PJP, *Pneumocystis jirovecii*; BCG, Bacillus Calmette–Guérin.

**Supplementary table 4. Key resources table**

| REAGENT or RESOURCE                                  | SOURCE          | IDENTIFIER        |
|------------------------------------------------------|-----------------|-------------------|
| <b>Antibodies</b>                                    |                 |                   |
| BV421 anti-human CD132 (clone AG184)                 | BD Biosciences  | Cat# 566222       |
| PE anti-human CD132 (clone AG184)                    | BD Biosciences  | Cat# 555900       |
| BV711 anti-human CD8 (clone RPA-T8)                  | BD Biosciences  | Cat# 563677       |
| BV786 anti-human CD56 (clone NCAM16.2)               | BD Biosciences  | Cat# 564058       |
| AlexaFluor® 647 anti-human CD16 (clone 3G8)          | BD Biosciences  | Cat# 557710       |
| PerCP-Cy™5.5 anti-human CD4 (clone RPA-T4)           | BD Biosciences  | Cat# 560650       |
| APC anti-human CD3 (clone UCHT1)                     | Biolegend       | Cat# 300412       |
| Alexa Fluor® 700 anti-human CD19 (clone HIB19)       | BD Biosciences  | Cat# 557921       |
| APC/Cyanine7 anti-human HLA-DR (clone L243)          | Biolegend       | Cat# 307618       |
| BV421 anti-human CD4 (clone RPA-T4)                  | BD Biosciences  | Cat# 562424       |
| BV510 anti-human CD3 (clone UCHT1)                   | BD Biosciences  | Cat# 563109       |
| VioBright515 anti-human CD56 (clone REA196)          | Miltenyi Biotec | Cat# 130-108-990  |
| AlexaFluor® 647 anti-human Stat5 (clone pY694)       | BD Biosciences  | Cat# 612599       |
| PE-eFluor610 anti-human CD14 (clone 61D3)            | eBioscience     | Cat# 61-0149-42   |
| PE-eFluor610 anti-human CD19 (clone HIB19)           | eBioscience     | Cat# 61-0199-42   |
| PE-Cy™7 anti-human CD8 (clone RPA-T8)                | BD Biosciences  | Cat# 557746       |
| PerCP-Cy™5.5 anti-human CD197 (clone 150503)         | BD Biosciences  | Cat# 561144       |
| APC-H7 anti-human CD3 (clone SK7)                    | BD Biosciences  | Cat# 560176       |
| BV421 anti-human CD28 (clone CD28.2)                 | BD Biosciences  | Cat# 562613       |
| BV510 anti-human CD3 (clone HIT3 $\alpha$ )          | BD Biosciences  | Cat# 564713       |
| FITC anti-human CD4 (clone RPA-T4)                   | BD Biosciences  | Cat# 561842       |
| PE anti-human CD57 (clone NK-1)                      | BD Biosciences  | Cat# 560844       |
| APC/Cyanine7 anti-human CD45RA (clone HI100)         | Biolegend       | Cat# 304128       |
| PE anti-human IFN- $\gamma$ (clone B27)              | BD Biosciences  | Cat# 554701       |
| APC anti-human TNF- $\alpha$ (clone Mab11)           | Invitrogen      | Cat# 17-7349-82   |
| CD3 pure-functional grade, human (clone OKT3)        | Miltenyi Biotec | Cat# 130-093-387  |
| <b>Chemicals, peptides, and recombinant proteins</b> |                 |                   |
| PepMix™ EBV (BARF1)                                  | JPT             | Cat# PM-EBV-BARF1 |
| PepMix™ Influenza A (MP1 /California (H1N1))         | JPT             | Cat# PM-INFA-MP1- |

|                                                             |                                             | H1N1              |
|-------------------------------------------------------------|---------------------------------------------|-------------------|
| PepMix™ HRSVA (major surface glycoprotein G)                | JPT                                         | Cat# PM-HRSVA-MSG |
| PepMix™ HCMVA (pp65) (>90%)                                 | JPT                                         | Cat# PM-PP65-2    |
| PepMix™ HCMVA (IE-1)                                        | JPT                                         | Cat# PM-IE1       |
| Purified protein derivative (PPD)                           | Dr. Brennan at<br>Aeras (Rockville,<br>MD). |                   |
| Recombinant human IL-2                                      | Peptotech                                   | 200-2             |
| Brilliant stain buffer                                      | BD Biosciences                              | Cat# 563794       |
| Dimethyl sulfoxide                                          | Sigma-Aldrich                               | Car# 276855       |
| Ficoll-paque PREMIUM                                        | GE Healthcare Life<br>Science               | Cat# 17-5442-02   |
| <b>Critical commercial assays</b>                           |                                             |                   |
| Brefeldin A protein transport inhibitor                     | BD Biosciences                              | Cat# 555029       |
| Monensin protein transport inhibitor                        | BD Biosciences                              | Cat# 554724       |
| eBioscience™ IC fixation buffer                             | Invitrogen                                  | Cat# 00-8222-49   |
| eBioscience™ Foxp3/transcription factor staining buffer set | Invitrogen                                  | Cat# 00-5523-00   |
| LIVE/DEAD fixable red dead cell stain kit                   | Invitrogen                                  | Cat# L23102       |
| LIVE/DEAD fixable aqua dead cell stain kit                  | Invitrogen                                  | Cat# L34957       |
| Methanol                                                    | Biosesang                                   | Cat# M1066        |

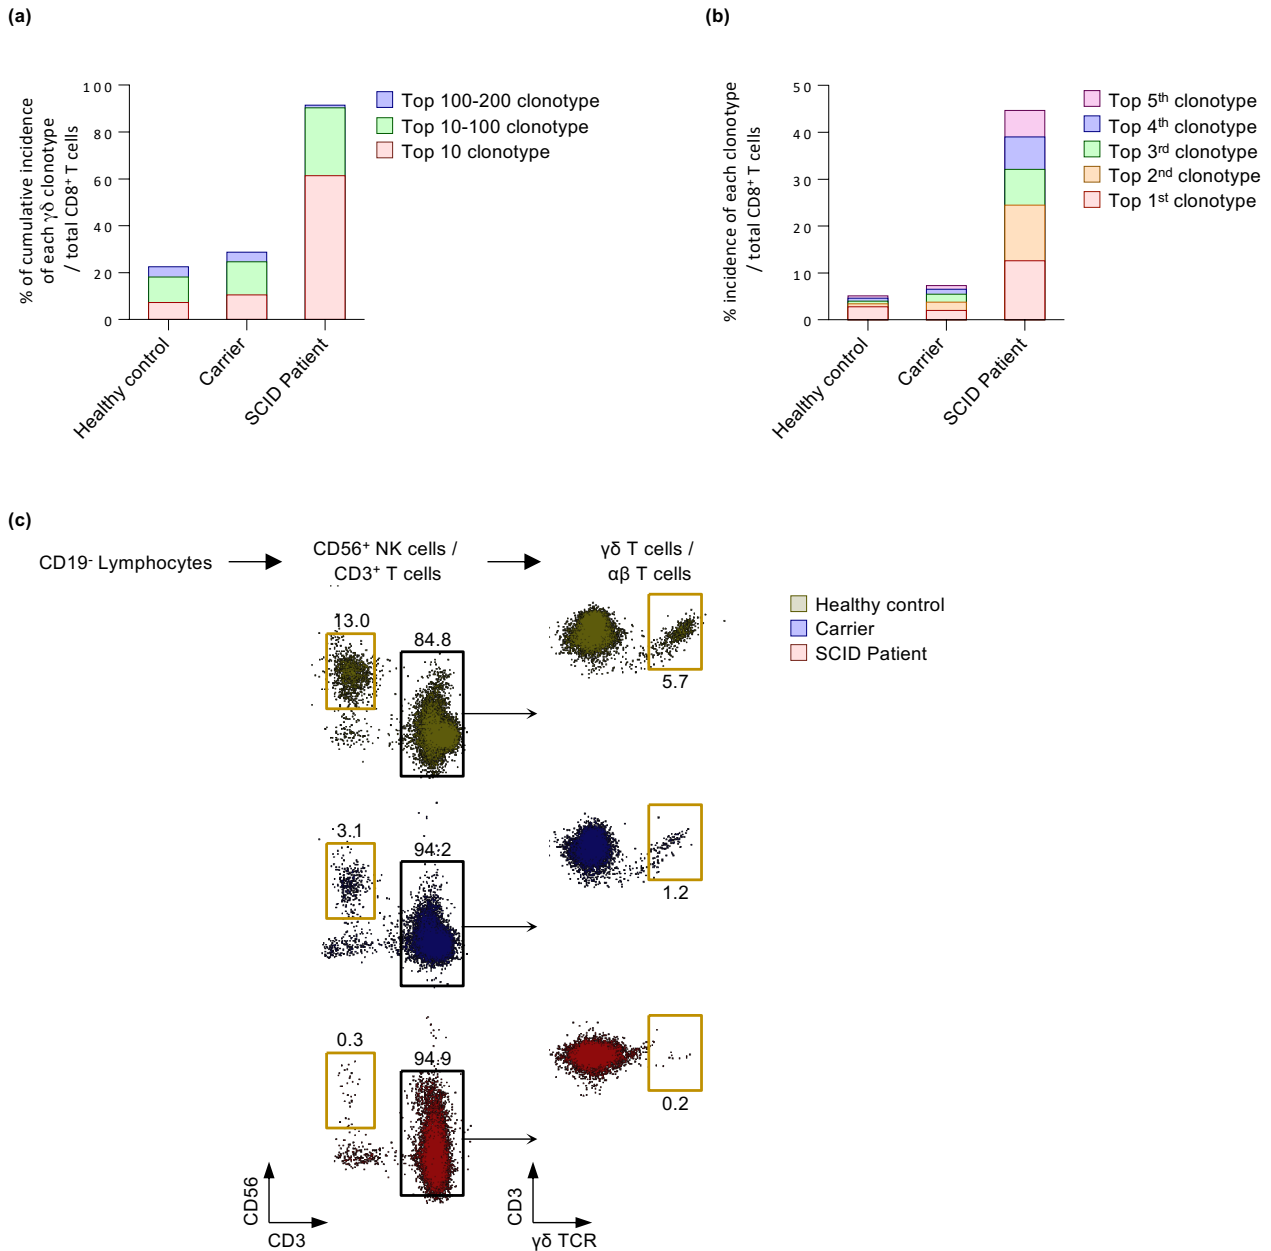

**Supplementary figure 1. (a, b)**  $\gamma\delta$ -TCR repertoire analysis of CD8<sup>+</sup> T cells from a healthy donor, carrier, and the SCID patient showed vigorous expansion of the oligoclonotypes of engrafted CD8<sup>+</sup> T cells from the patient. **(c)** Proportion of  $\gamma\delta$ -T cells among CD3<sup>+</sup> T cells from a healthy donor, carrier, and the patient.

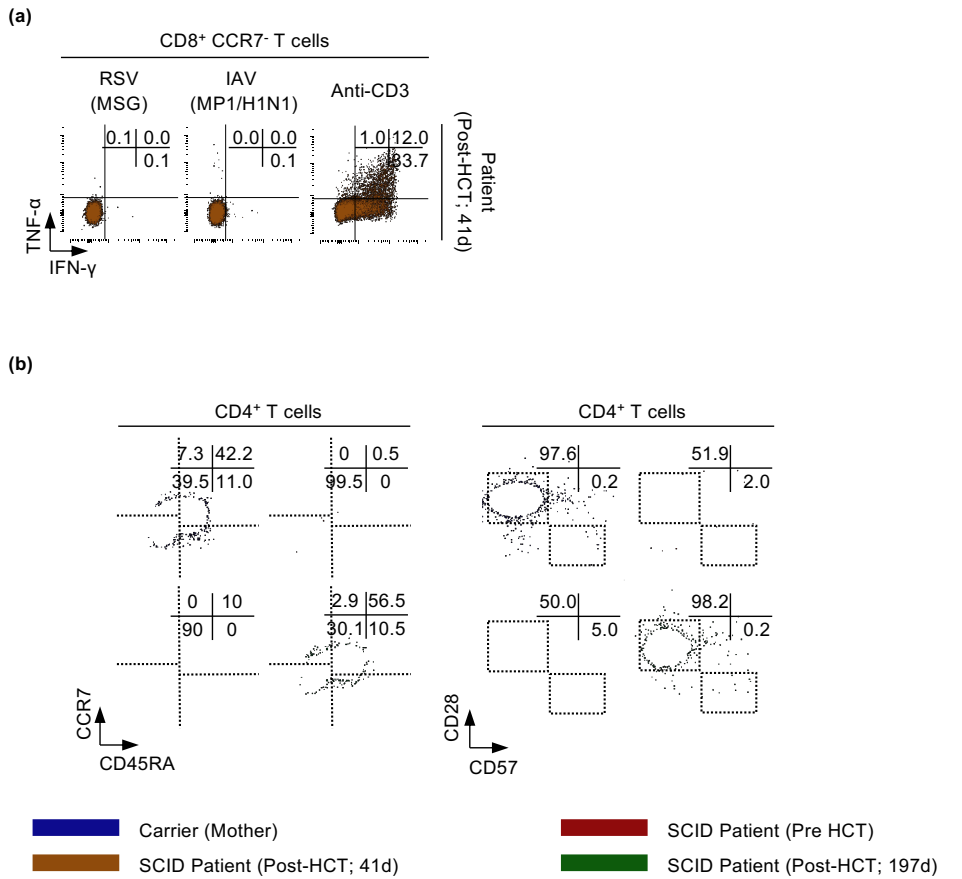

**Supplementary figure 2.** (a) Engrafted CD8<sup>+</sup> T cells did not respond to viral antigen after HCT. (b) Immunophenotyping analysis revealed an increased frequency of effector/effector memory (CD45RA<sup>-</sup>CCR7<sup>-</sup>) and replicative senescent (CD28<sup>-</sup>CD57<sup>+</sup>) CD4<sup>+</sup> T cells from the patient pre-HCT. The percentage of naïve CD4<sup>+</sup> T cells was increased after HCT.
